# Supplementary material for: Impact of a Static Magnetic Field on Early Osseointegration: A Pilot Study in Canines
Source: MDPI journal article supplement (doi:10.3390/ma16051846), 2023-02-23
Supplement: s1 [file s1]

Supplementary Table S1: Descriptive statistics for the early osseointegration at 7- and 15-days post-implantation. Explants carrying the implant were histomorphometrically analyzed in two regions of interest, cortical and medullary compartment, for new bone formation (nBV/TV %) and relative coverage of the implant by newly formed bone (nBIC %).

| Duration | Site      | Treatment | nBV/TV % |      |        | nBIC % |      |        | n |
|----------|-----------|-----------|----------|------|--------|--------|------|--------|---|
|          |           |           | Mean     | SD   | Median | Mean   | SD   | Median |   |
| 7 days   | Cortical  | Control   | 0.1      | 0.2  | 0.0    | 0.0    | 0.0  | 0.0    | 4 |
|          |           | Magnetic  | 0.0      | 0.0  | 0.0    | 0.0    | 0.0  | 0.0    | 6 |
|          | Medullary | Control   | 0.8      | 1.5  | 0.0    | 1.6    | 3.2  | 0.0    | 4 |
|          |           | Magnetic  | 0.3      | 0.8  | 0.0    | 0.2    | 0.5  | 0.0    | 6 |
| 15 days  | Cortical  | Control   | 6.5      | 6.0  | 5.4    | 9.5    | 10.4 | 7.3    | 7 |
|          |           | Magnetic  | 11.8     | 8.0  | 14.9   | 25.5   | 22.5 | 41.3   | 7 |
|          | Medullary | Control   | 20.0     | 14.4 | 22.4   | 38.8   | 28.8 | 44.8   | 7 |
|          |           | Magnetic  | 20.1     | 8.6  | 22.2   | 34.5   | 26.2 | 28.6   | 7 |
